# Supplementary material for: Two-dimensional imine-based covalent–organic-framework derived nitrogen-doped porous carbon nanosheets for high-performance lithium–sulfur batteries
Source: Royal Society of Chemistry journal article supplement (doi:10.1039/d1nj00610j), 2021-01-01
Supplement: d1nj00610j1.pdf [file d1nj00610j1.pdf]

## Supporting Information

### **Two-Dimensional Imine-Based Covalent-Organic-Framework Derived Nitrogen-Doped Porous Carbon Nanosheets for High- Performance Lithium-Sulfur Batteries**

Chaofei Guo, Jiaojiao Xu, Li-Ping Lv, Shuangqiang Chen, Weiwei Sun\*, Yong  
Wang\*

Department of Chemical Engineering, School of Environmental and Chemical  
Engineering, Shanghai University, 99 Shangda Road, Shanghai, P. R. China, 200444

\*Corresponding authors: Tel: +86-21-66137723; Fax: +86-21-66137725

Email address: [vivisun@shu.edu.cn](mailto:vivisun@shu.edu.cn); [yongwang@shu.edu.cn](mailto:yongwang@shu.edu.cn)

**a**

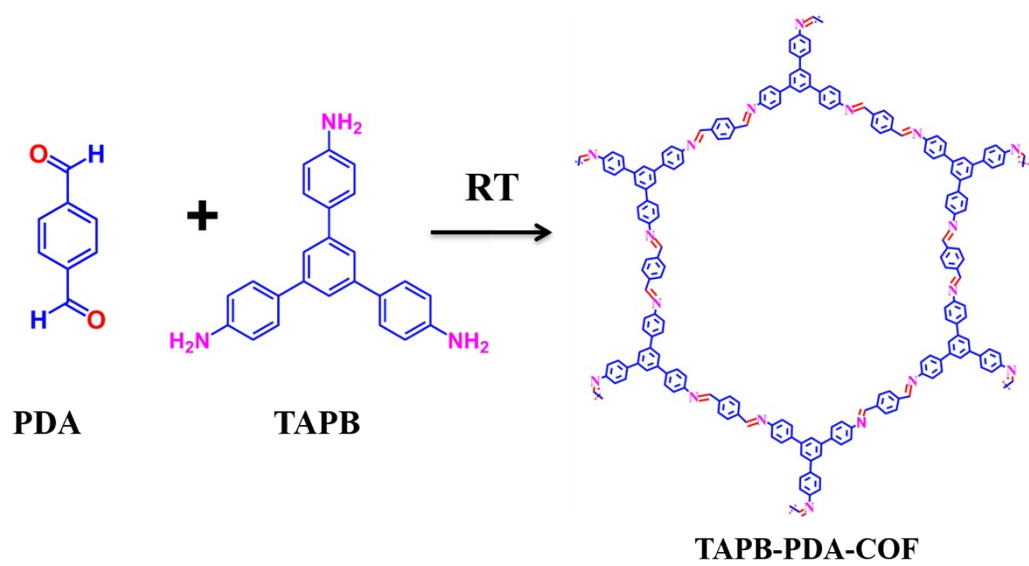

**Fig. S1.** Construction of the TAPB-PDA-COF.

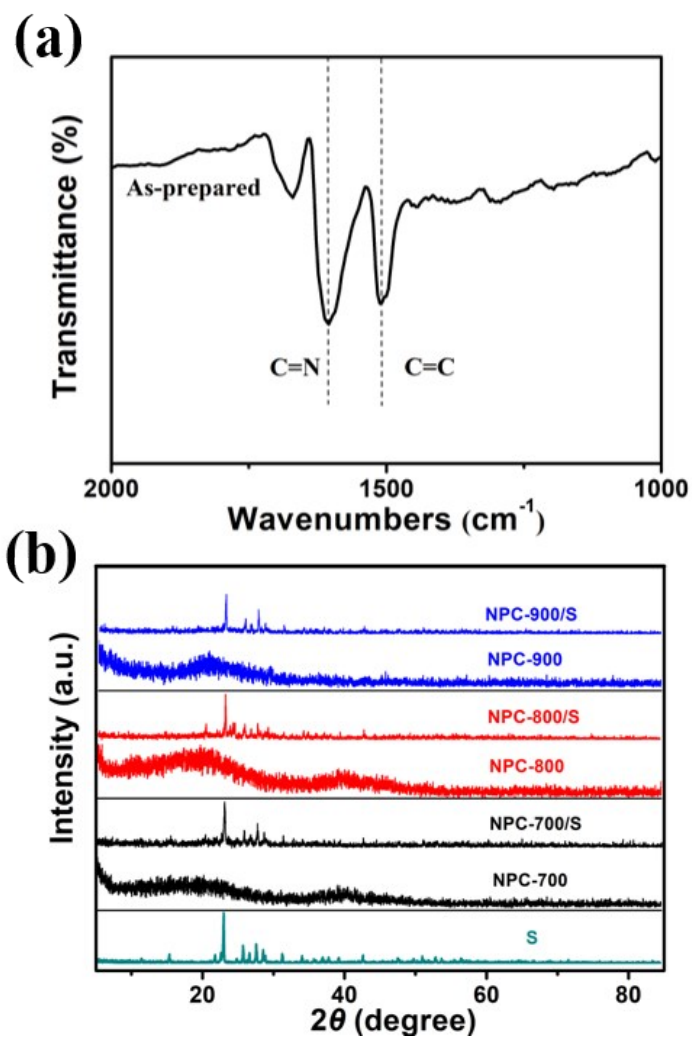

**Fig. S2.** (a) The FT-IR spectra of TAPB-PDA-COF. (b) XRD patterns of sulfur, NPC-700, NPC-700/S, NPC-800, NPC-800/S, NPC-900 and NPC-900/S.

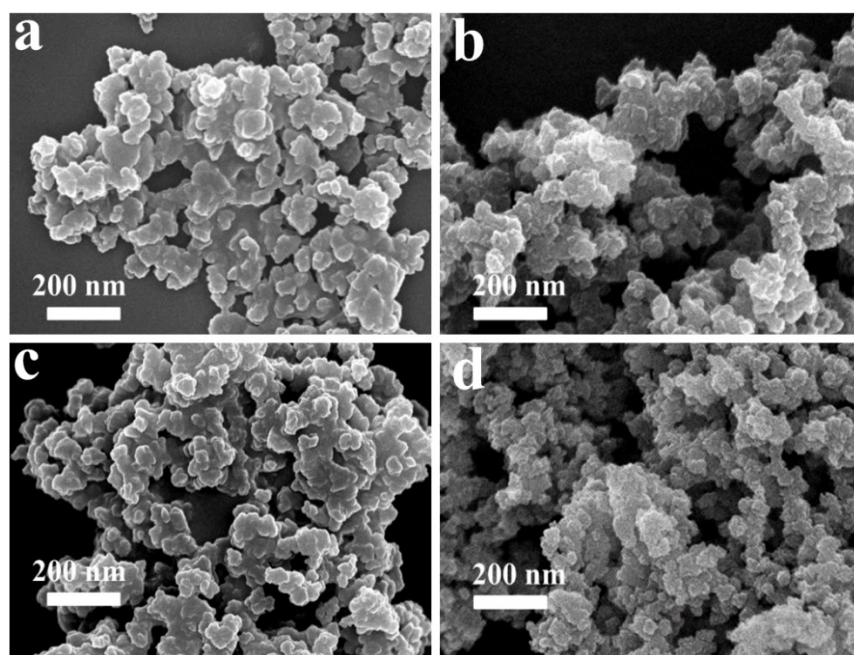

**Fig. S3.** SEM images of (a) NPC-700, (b) NPC-700/S, (c) NPC-900 and (d) NPC-900/S.

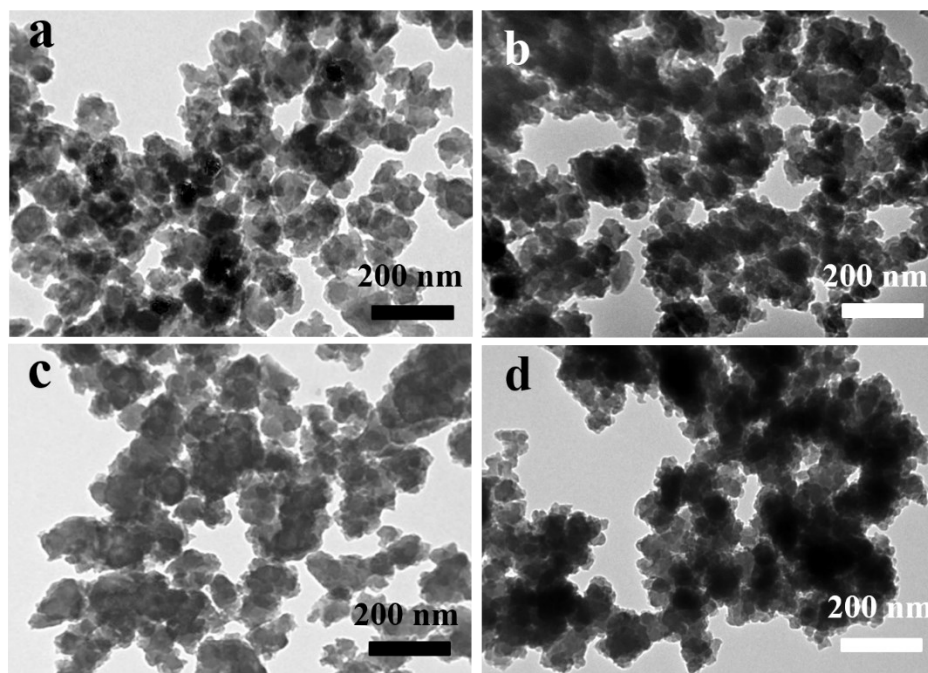

**Fig. S4.** TEM images of (a) NPC-700, (b) NPC-700/S, (c) NPC-900 and (d) NPC-900/S.

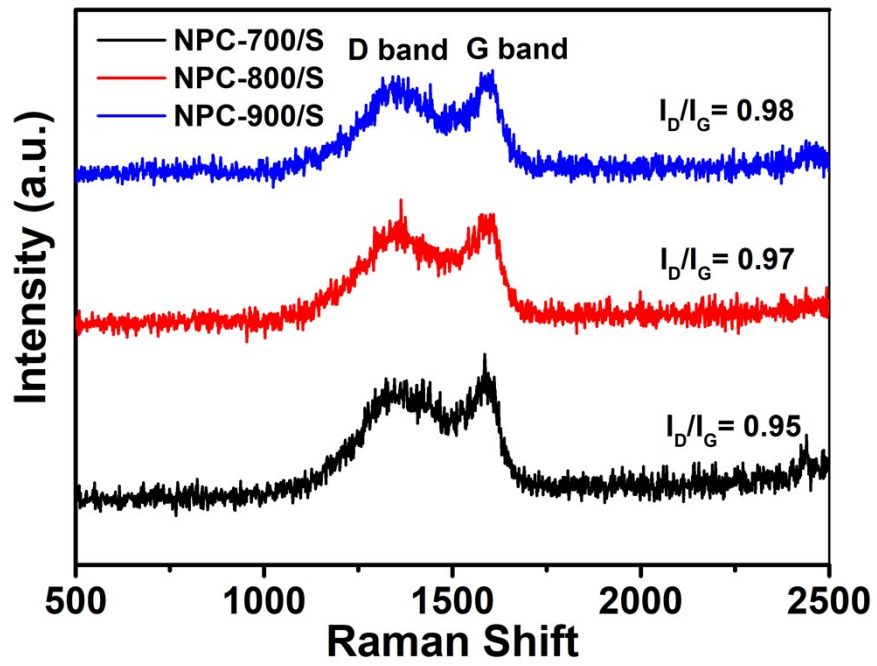

Fig. S5. Raman spectra of NPC-700/S, NPC-800/S, and NPC-900/S.

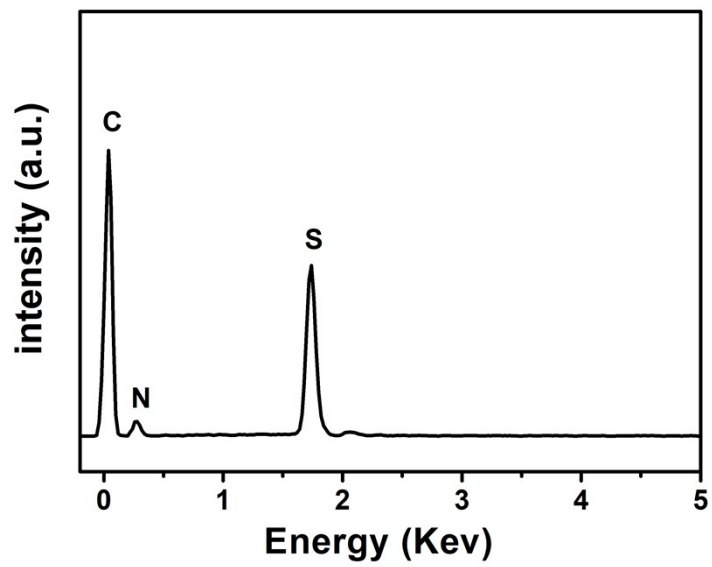

**Fig. S6.** EDS spectra of NPC-800/S.

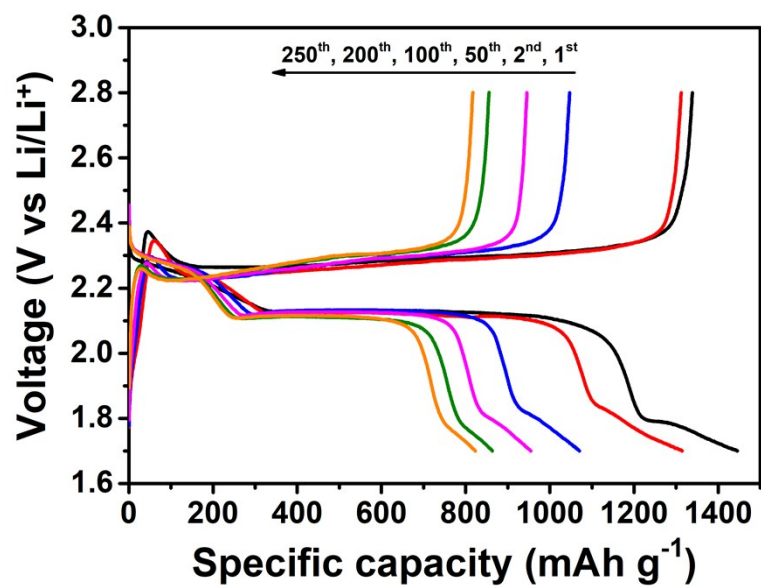

Fig. S7. Discharge/charge curves of NPC-800/S after different cycles.



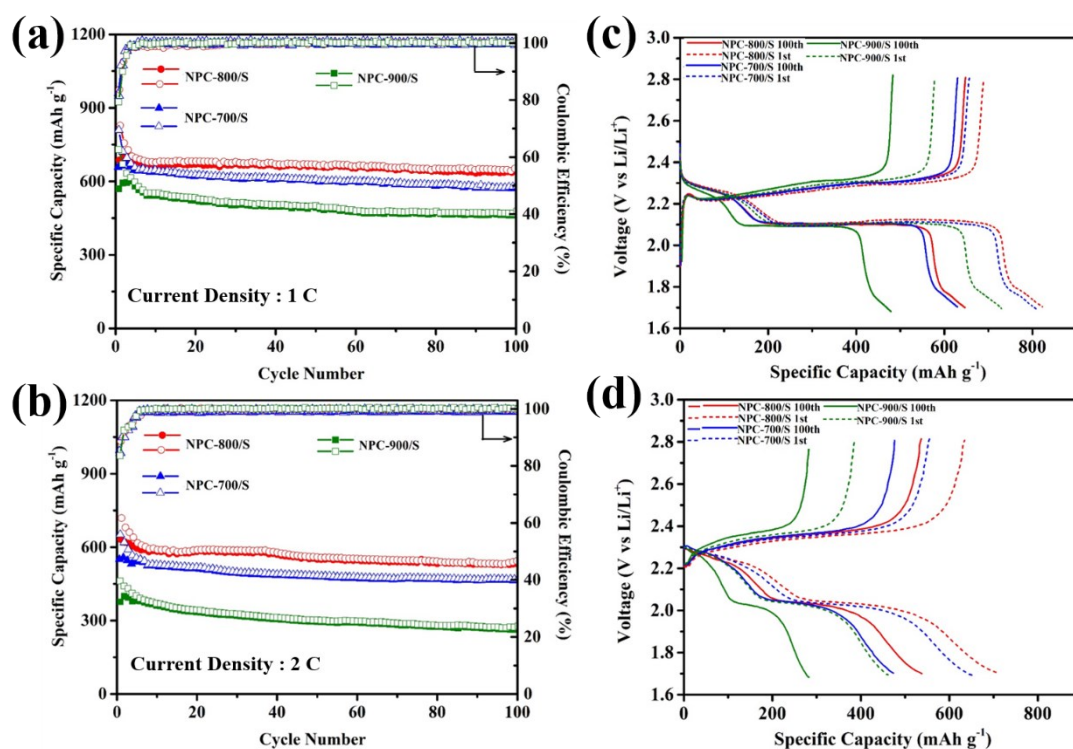

**Fig. S8.** Cycling performances of NPC-700/S, NPC-800/S and NPC-900/S under current rates of (a) 1 C and (b) 2 C. Discharge/charge curves of NPC-700/S, NPC-800/S, and NPC-900/S for the first cycle and the 100<sup>th</sup> cycle under current rates of (c) 1 C and (d) 2 C.

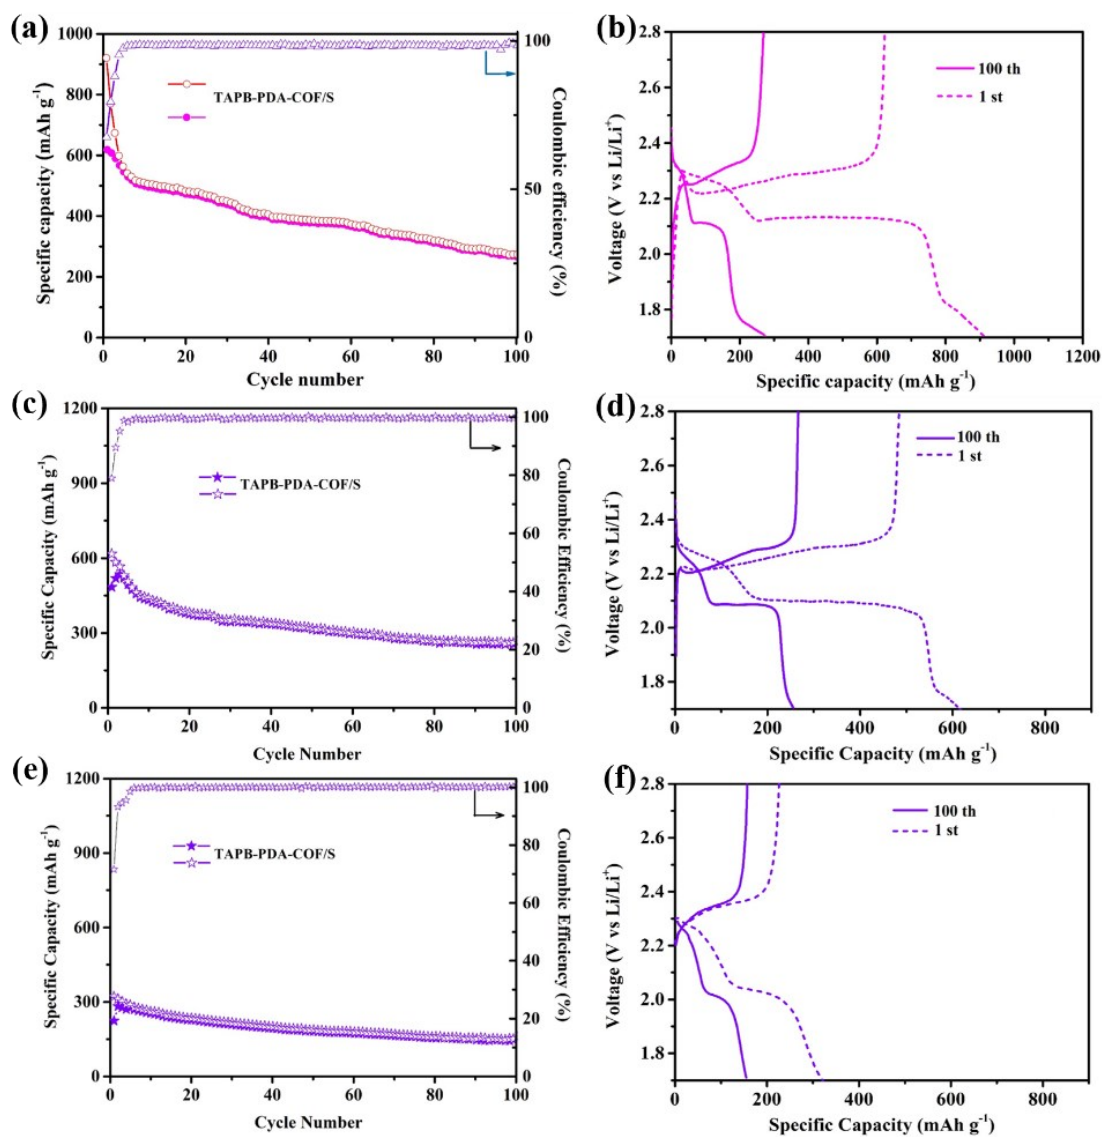

**Fig. S9.** (a) Cycling performance and (b) charge/discharge profiles for the first and 100<sup>th</sup> cycles of TAPB-PDA-COF/S under the current rate of 0.1 C. (c) Cycling performance and (d) charge/discharge profiles for the first and 100<sup>th</sup> cycles of TAPB-PDA-COF/S under the current rate of 1 C. (e) Cycling performance and (f) charge/discharge profiles for the first and 100<sup>th</sup> cycles of TAPB-PDA-COF/S under the current rate of 2 C.

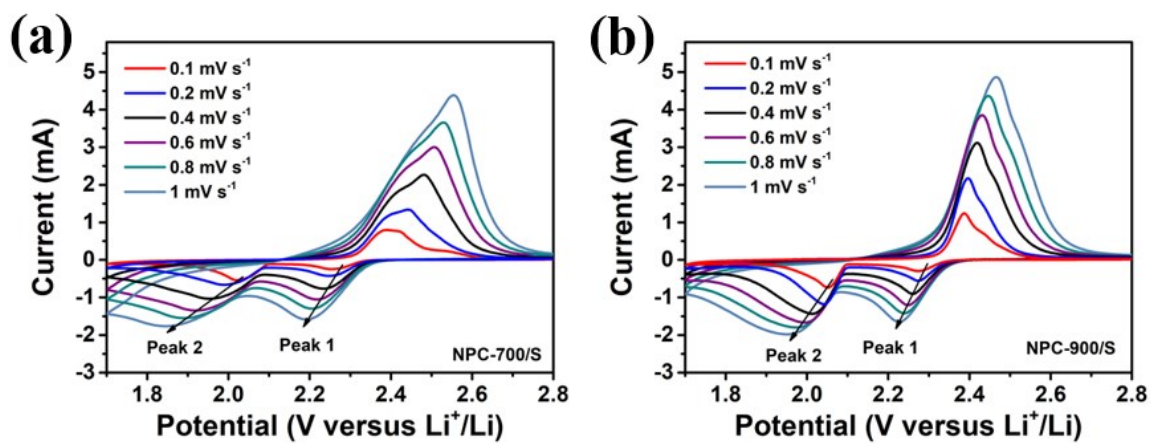

**Fig. S10.** CV curves of (a) NPC-700/S and (b) NPC-900/S electrode at different scan rate ranging from 0.1 to 1 mV s<sup>-1</sup>.

**Table S1** | Electrochemical property comparison between the NPC/S electrode of this work and carbon related materials with S electrodes from previous relative reports. (IRC: initial reversible capacity, mAh g<sup>-1</sup>; RRC: retained reversible capacity, mAh g<sup>-1</sup>; CN: cycle number; CD: current density, mA g<sup>-1</sup>; V: voltage range, V)

| Composite                       | Morphology  | IRC/CD    | RRC/CN/CD    | V         | Ref       |
|---------------------------------|-------------|-----------|--------------|-----------|-----------|
| N-doped C                       | nanosheet   | 1398/100  | 762/10/500   | 1.7-2.8   | This work |
| N-doped C                       | sphere      | 1660/50   | 1000/20/50   | 1.0-3.0   | [1]       |
| N-doped C                       | porous      | 1598/30   | 670/200/1000 | 1.5-3.0   | [2]       |
| N-doped C                       | sphere      | 1200/200  | 706/400/1000 | 1.9-2.7   | [3]       |
| N-doped C                       | coralloid   | 1166/100  | 607/200/800  | 1.5-3.0   | [4]       |
| Carbon                          | sheets      | 1360/100  | 493/1000/500 | 1.8-2.8   | [5]       |
| Carbon                          | sheet       | 1344/1000 | 1017/50/1000 | 1.8-2.6   | [6]       |
| Carbon                          | nanotube    | 1090/500  | 818/400/500  | 1.5-2.8   | [7]       |
| C nanotube Particles            | nanotube    | 1544/500  | 901/100/500  | 1.5-2.8   | [8]       |
| N-doped C on graphene           | sheet       | 1332/100  | 608/300/1000 | 1.7-2.8   | [9]       |
| N-doped C with graphene         | sphere      | 1360/200  | 600/200/2000 | 1.5-2.8   | [10]      |
| Graphene/reduced-graphene oxide | network     | 1000/200  | 645/350/200  | 1.5-2.8   | [11]      |
| N/O-doped C                     | flower-like | 1320/100  | 1027/100/200 | 1.85-2.65 | [12]      |
| CNT-N-doped C                   | thin film   | 1235/50   | 926/200/1000 | 1.8-2.5   | [13]      |
| N-doped C                       | sphere      | 1134/100  | 969/30/500   | 1.0-3.0   | [14]      |
| N,S-doped C                     | nanorod     | 1370/200  | 1080/100/500 | 1.8-3.0   | [15]      |

## REFERENCES

- [1] Zhang, J, W., Cai, Y, R., Zhong, Q, W., Lai, D, Z., Yao, J, M. (2015). Porous nitrogen-doped carbon derived from silk fibroin protein encapsulating sulfur as a superior cathode material for high-performance lithium-sulfur batteries. *Nanoscale*, 7, 17791-17797. Doi: 10.1039/c5nr04768d.
- [2] Zhang, X., Yao, L., Liu, S., Zhang, Q., Mai, Y, Y., Hu, N, T., Wei, H. (2018). High-performance lithium sulfur batteries based on nitrogen-doped graphitic carbon derived from covalent organic frameworks. *Mater. Today. Energy*. 7, 141-148. Doi: 10.1016/j.mtener.2018.01.003.
- [3] Pei, F., An, T, H., Zang, J., Zhao, X, J., Fang, X, L. Zheng, M, S., Dong, Q, F., Zheng, N, F. (2016). From Hollow Carbon Spheres to N-Doped Hollow Porous Carbon Bowls: Rational Design of Hollow Carbon Host for Li-S Batteries. *Adv. Energy. Mater.* 6, 1502539. Doi: 10.1002/aenm.201502539.
- [4] Yang, J., Wang, S, Y., Ma, Z, P., Du, Z, L., Li, C, Y., Song, J, J., Wang, G, L., Shao, G, J. (2015). Novel nitrogen-doped hierarchically porous coralloid carbon materials as host matrixes for lithium-sulfur batteries. *Electrochim. Acta*. 159, 8-15. Doi: 10.1016/j.electacta.2015.01.187
- [5] Feng, S., Song, J, H., Zhu, C, Z., Shi, Q, R., Liu, D., Li, J, C., Du, D., Zhang, Q., Lin, Y, H. (2019). Assembling Carbon Pores into Carbon Sheets: Rational Design of Three-Dimensional Carbon Networks for a Lithium-Sulfur Battery. *ACS. Appl. Mater. Interfaces*. 11, 5911-5918. Doi: 10.1021/acsami.8b17549
- [6] Li, G., Lei, W., Luo, D., Deng, Y, P., Wang, D, L., Chen, Z, W. (2018). 3D Porous Carbon Sheets with Multidirectional Ion Pathways for Fast and Durable Lithium-Sulfur Batteries. *Adv. Energy. Mater.* 8, 1702381. Doi: 10.1002/aenm.201702381
- [7] Jin, S., Xin, S., Wang, L, J., Du, Z, Z., Cao, L, N., Chen, J, F., Kong, X, H., Gong, M., Lu, J, L., Zhu, Y, W. (2016). Covalently Connected Carbon Nanostructures for Current Collectors in Both the Cathode and Anode of Li-S Batteries. *Adv. Mater.* 28, 9094-9102. Doi: DOI: 10.1002/adma.201602704.
- [8] Gueon, D., and Hwang, T, H., Yang, S, B., Cho, E., Sohn, K., Yang, D, K., Moon, J, H. (2018). Spherical Macroporous Carbon Nanotube Particles with Ultrahigh Sulfur Loading for

- Lithium–Sulfur Battery Cathodes. *ACS. Nano.* 12, 226-233. Doi: 10.1021/acsnano.7b05869
- [9] Chen, K., Sun, Z, H., Fang, R, P., Shi, Y., Cheng, H, M., Li, F. (2018). Metal-Organic Frameworks (MOFs)-Derived Nitrogen-Doped Porous Carbon Anchored on Graphene with Multifunctional Effects for Lithium-Sulfur Batteries. *Adv. Funct. Mater.* 28, 1707592. Doi: 10.1002/adfm.201707592.
- [10] Zhou, G, M., Y. Zhao, Y, B., Manthiram, A. (2015). Dual-Confined Flexible Sulfur Cathodes Encapsulated in Nitrogen-Doped Double-Shelled Hollow Carbon Spheres and Wrapped with Graphene for Li-S Batteries. *Adv. Energy. Mater.* 5, 1402263, Doi: DOI: 10.1002/aenm.201402263.
- [11] Hu, G, J., Xu, C., Sun, Z, H., Wang, S, G., Cheng, H, M. Li, F., Ren, W, C. (2016). 3D Graphene-Foam-Reduced-Graphene-Oxide Hybrid Nested Hierarchical Networks for High-Performance Li-S Batteries. *Adv. Mater.* 28, 1603-9. Doi: 10.1002/adma.201504765.
- [12] Wang, Q., Wang, Z, B., Li, R, R., Liu, H, H., Yang, M, H., Li, C., Gu, D, M. (2018). Flower-like nitrogen-oxygen-doped carbon encapsulating sulfur composite synthesized via in-situ oxidation approach. *Chem, Eng. J.* 345, 271-279. Doi: 10.1016/j.cej.2018.03.179.
- [13] Liu, Y, Z., Li, G, R., Chen, Z, W., Peng, X, S. (2017). CNT-threaded N-doped porous carbon film as binder-free electrode for high-capacity supercapacitor and Li–S battery. *J. Mater. Chem. A.* 5, 9775-9784. Doi: 10.1039/c7ta01526g.
- [14] Li, Z, Q., and Yin, L, W., (2015). Nitrogen-doped MOF-derived micropores carbon as immobilizer for small sulfur molecules as a cathode for lithium sulfur batteries with excellent electrochemical performance. *ACS. Appl. Mater. Interfaces.* 7, 4029-4038. Doi: 10.1021/am507660y
- [15] Pang, Q., Tang, J, T., Huang, H., Liang, X., Hart, C., Tam, K, C., Nazar, L, F. (2015). A nitrogen and sulfur dual-doped carbon derived from polyrhodanine@cellulose for advanced lithium-sulfur batteries. *Adv. Mater.* 27, 6021-6028. Doi: 10.1002/adma.201502467.
